# Supplementary material
Source: ML conference proceedings conference paper supplement (https://openreview.net/forum?id=k9J34635wq)

Pendulum;  $n = 10^5$

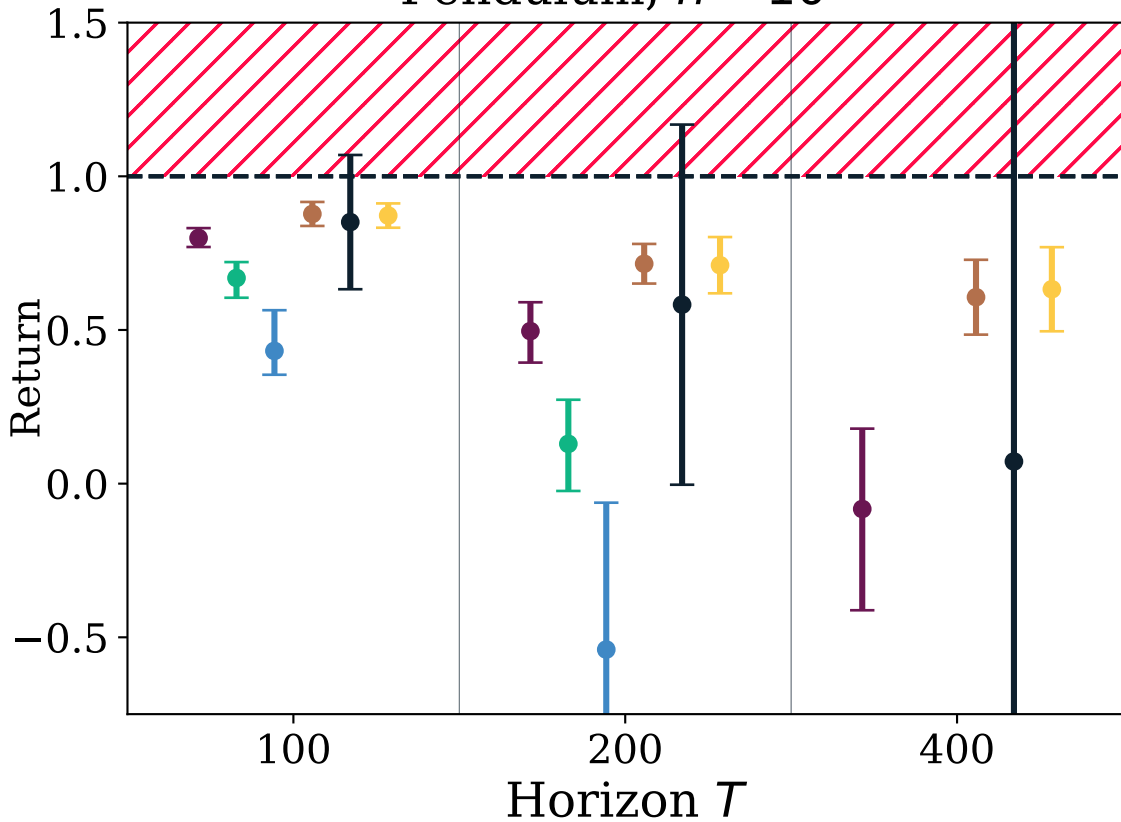

Supplement: supplementary_material [file attachment]

# Pendulum-v1; GP Experiment; Horizon $T = 100$

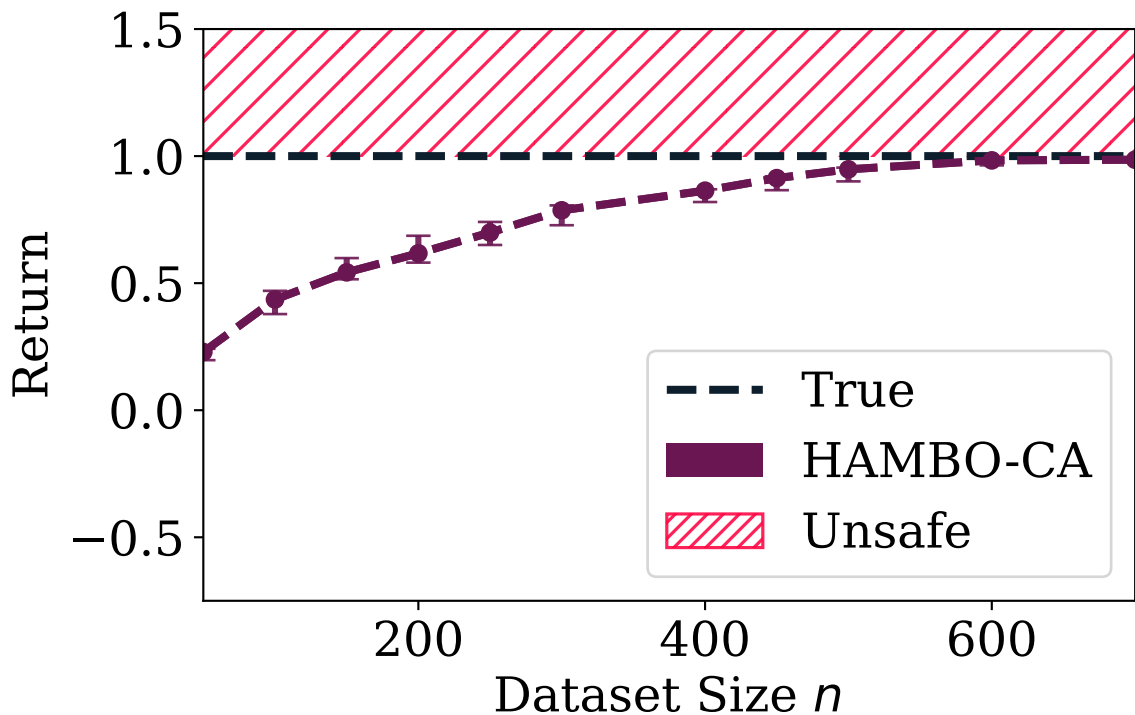

Supplement: supplementary_material [file attachment]

# PointEnv; GP Experiment; Horizon $T = 100$

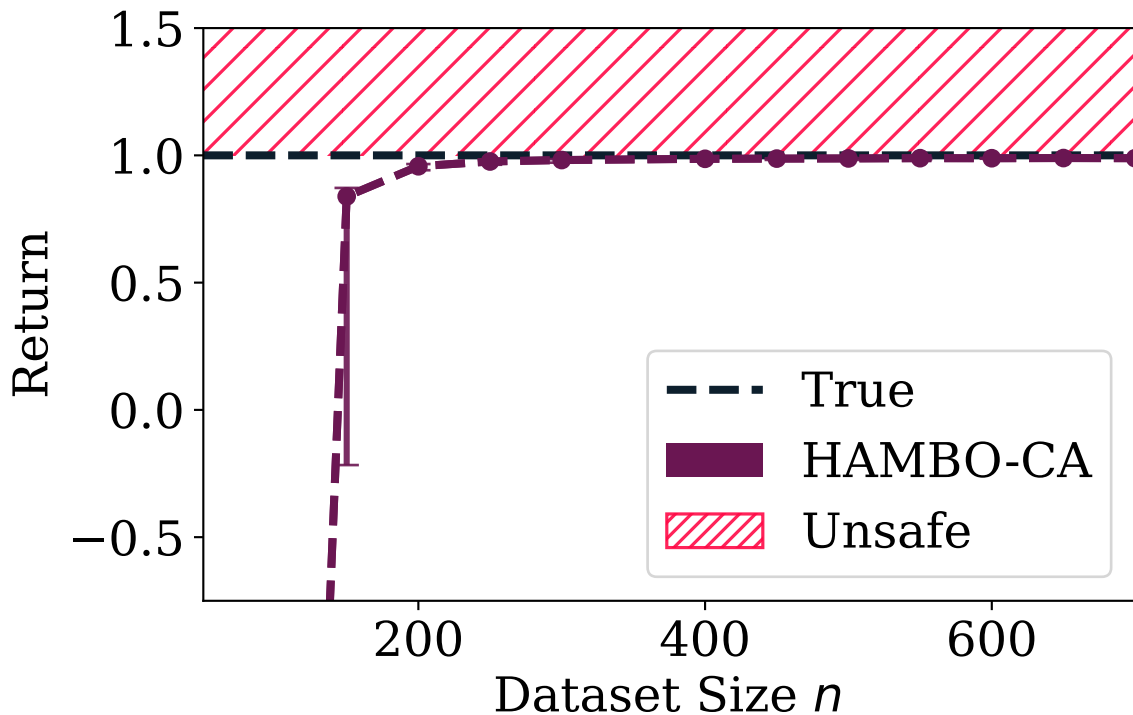

Supplement: supplementary_material [file attachment]

Hopper; Horizon  $T = 200$

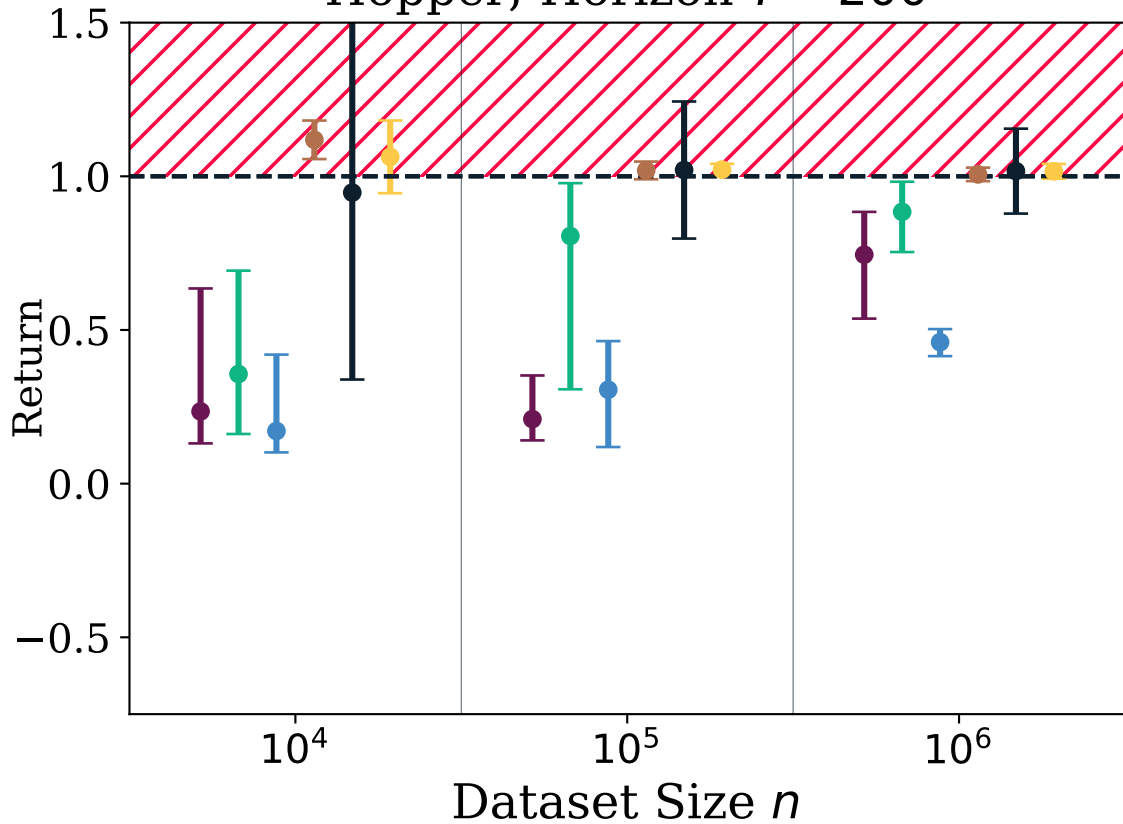

Supplement: supplementary_material [file attachment]

Pendulum; Horizon  $T = 200$

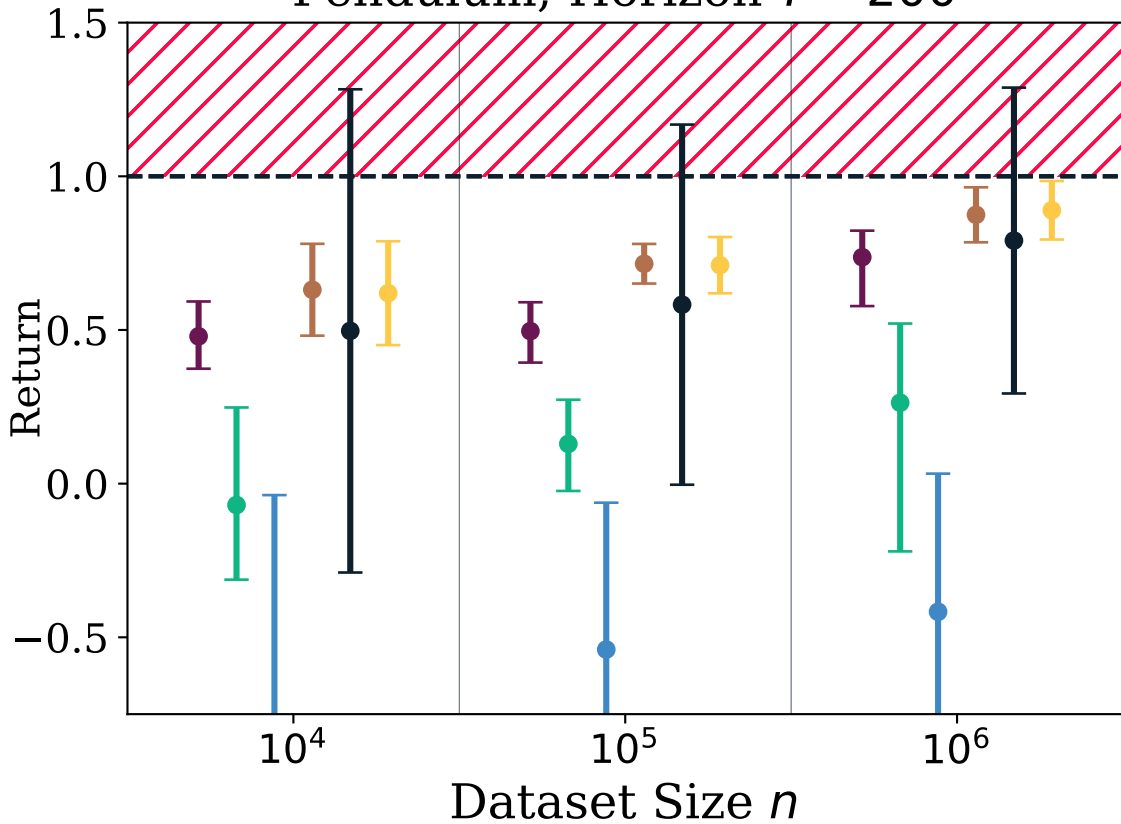

Supplement: supplementary_material [file attachment]

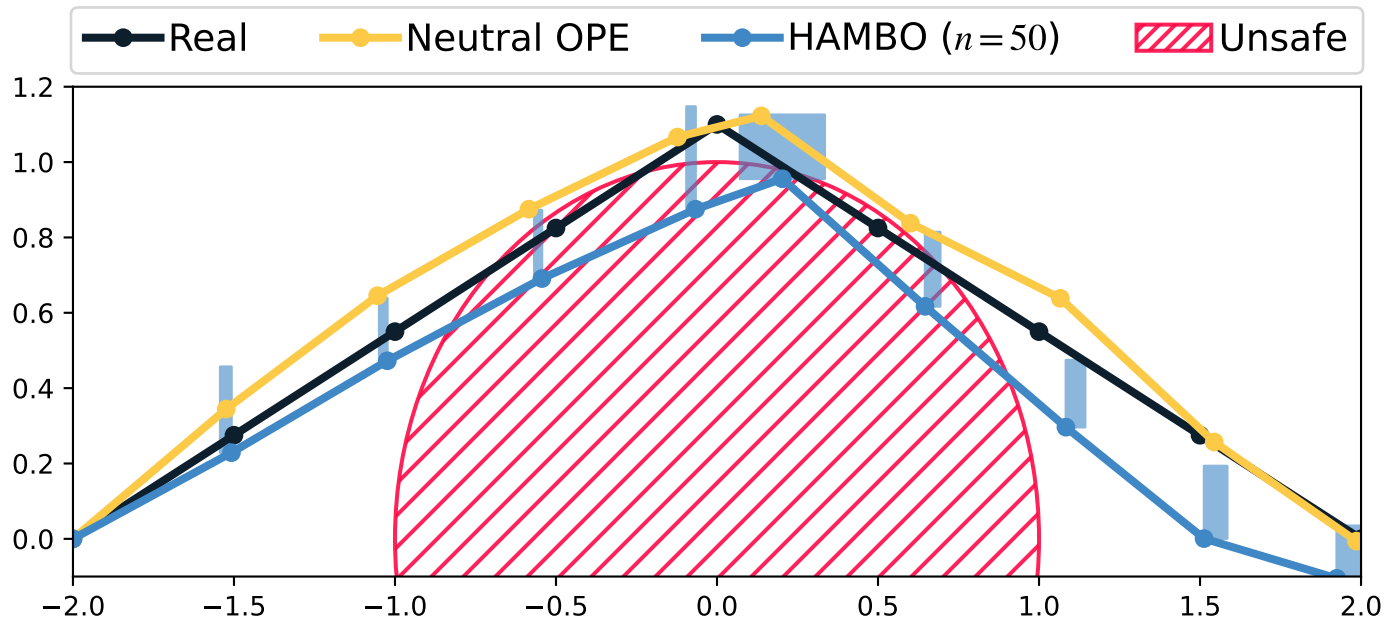

Supplement: supplementary_material [file attachment]

# HalfCheetah; Horizon $T = 100$

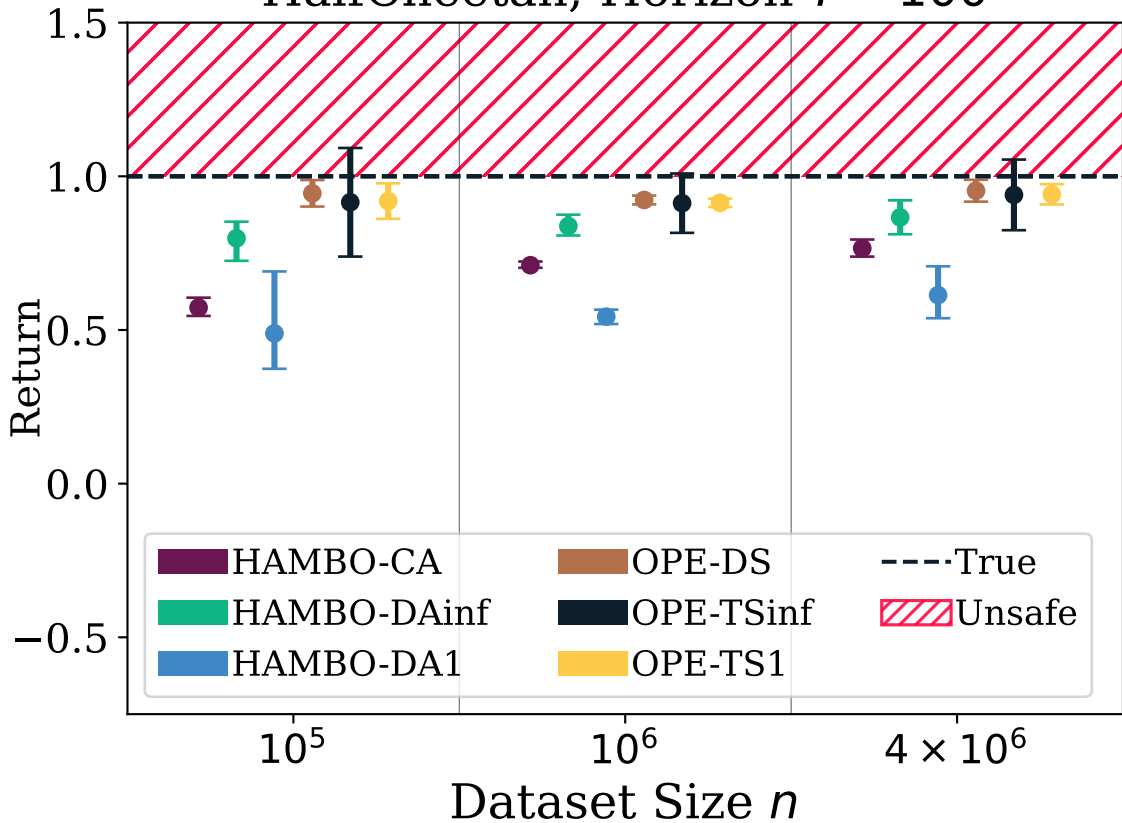

Supplement: supplementary_material [file attachment]

# HalfCheetah; $n = 4 \times 10^6$

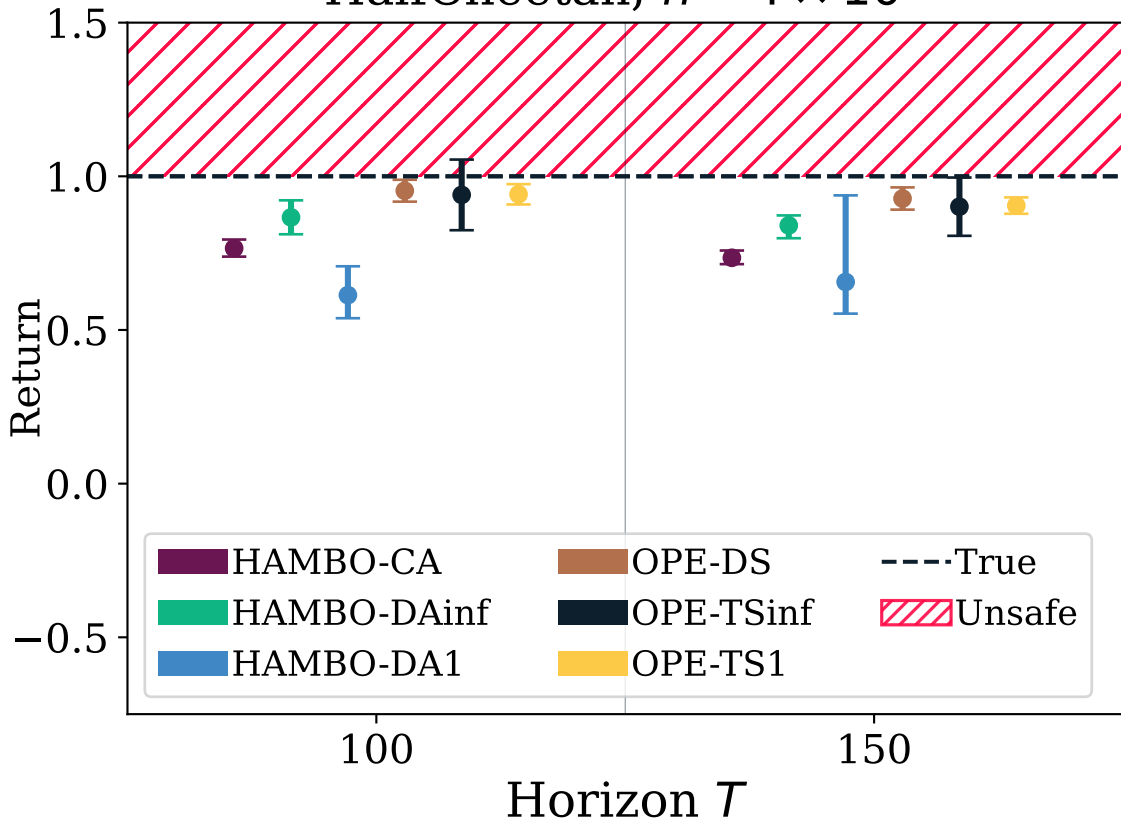

Supplement: supplementary_material [file attachment]

Hopper;  $n = 10^5$

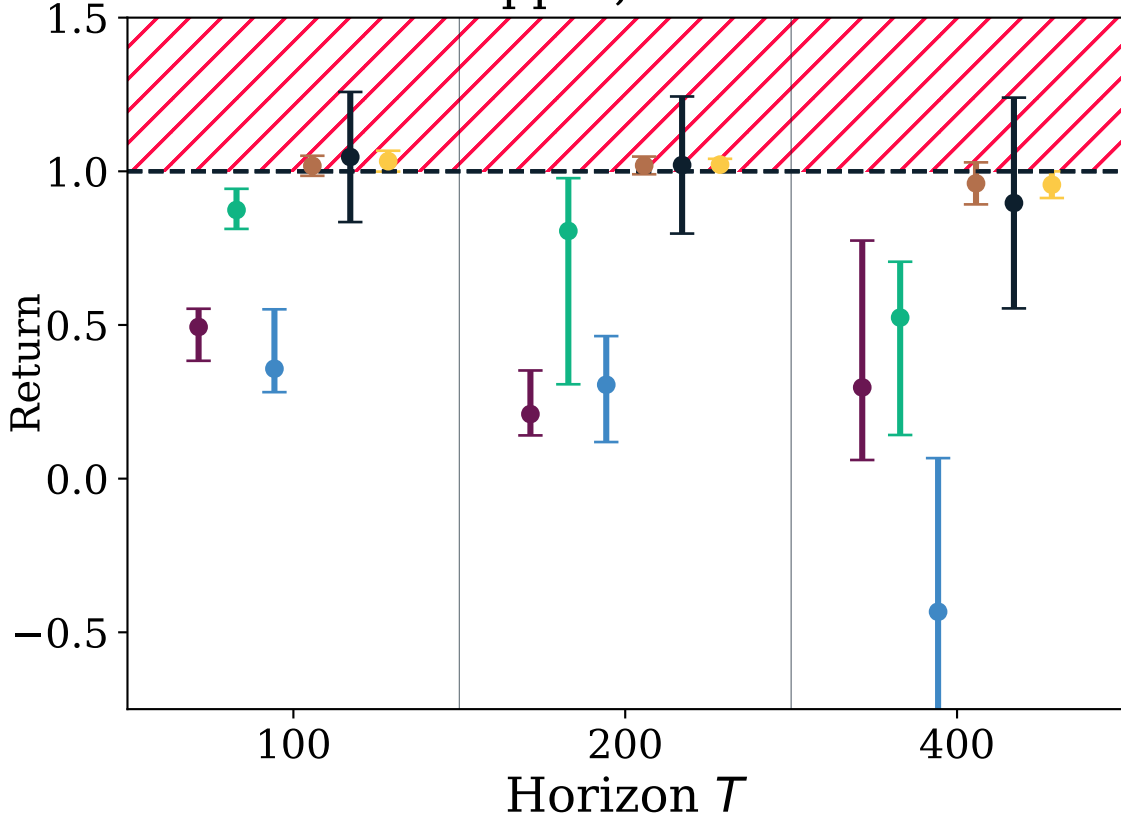

Supplement: supplementary_material [file attachment]
